# Supplementary material for: Contemporary Zika Virus Isolates Induce More dsRNA and Produce More Negative-Strand Intermediate in Human Astrocytoma Cells
Source: MDPI journal article supplement (doi:10.3390/v10120728), 2018-12-19
Supplement: s1 [file s1]

**Table S1. List of ZIKV Genbank accession numbers of sequences used in phylogenetic analysis.**

| <b>Name</b>                   | <b>Genbank Accession #</b> | <b>Name</b>       | <b>Genbank Accession #</b> |
|-------------------------------|----------------------------|-------------------|----------------------------|
| Brazil/2015                   | KU321639                   | Honduras/2015     | KX694534                   |
| Brazil/2015                   | KU527068                   | Honduras/2016     | KX262887                   |
| Brazil/2015                   | KX280026                   | Malaysia/1966     | KX377336                   |
| Brazil/2015                   | KX520666                   | Martinique/2015   | KU647676                   |
| Brazil/2016                   | KU926310                   | Mexico/2015       | KX247632                   |
| Brazil/2016                   | KU926309                   | Mexico/2016       | KX446951                   |
| Cambodia/2010                 | KU955593                   | Micronesia/2007   | EU545988                   |
| Canada/2013                   | KF993678                   | Nigeria/1968      | KU963574                   |
| Central African Republic/1968 | KF383115                   | Panama/2015       | KX156775                   |
| Central African Republic/1976 | KF268948                   | Panama/2015       | KX198135                   |
| Central African Republic/1979 | KF268950                   | Phillippines/2012 | KU681082                   |
| Central African Republic/1980 | KF268949                   | Puerto Rico/2015  | KX377337                   |
| China/2016                    | KU761564                   | Samoa/2016        | KX185891                   |
| Columbia/2015                 | KX548902                   | Senegal/1968      | KF383116                   |
| Columbia/2016                 | KX247646                   | Senegal/1984      | HQ234501                   |
| Dominican Republic/2016       | KU853012                   | Senegal/1997      | KF383117                   |
| Ecuador/2016                  | KX879603                   | Senegal/2001      | KF383119                   |
| French Guiana/2015            | KU758877                   | Singapore/2016    | KX813683                   |
| French Polynesia/2013         | KJ776791                   | Suriname/2015     | KU312312                   |
| French Polynesia/2014         | KX447511                   | Suriname/2016     | KU937936                   |
| Guadeloupe/2016               | KX673530                   | Thailand/2014     | KU680181                   |
| Guatemala/2015                | KU501217                   | Tonga/2016        | KX806557                   |
| Guatemala/2016                | KU870645                   | Uganda/1947       | KU955594                   |
| Haiti/2014                    | KU509998                   | USA/2016          | KX842449                   |
| Haiti/2016                    | KX051563                   | Venezuela/2016    | KX702400                   |

**Table S2. Source host, isolation and passage history of ZIKV strains used in this study**

| <b>Lineage</b> | <b>Strain</b> | <b>Source Host</b> | <b>Year</b> | <b>Location</b>     | <b>Passage History</b>                                              | <b>Genbank Accession</b> |
|----------------|---------------|--------------------|-------------|---------------------|---------------------------------------------------------------------|--------------------------|
| African        | MR 766        | Rhesus monkey      | 1947        | Uganda              | 146x SM <sup>a</sup> , 1x C6/36 <sup>b</sup> , 1x Vero <sup>c</sup> | HQ234498.1               |
| Asian          | PLCal_ZV      | Human              | 2013        | Canada/<br>Thailand | 4x Vero                                                             | KF993678                 |
| Asian          | PRVABC59      | Human              | 2015        | Puerto Rico         | 3x Vero                                                             | KU501215.1               |
| Asian          | HS-2015-BA-01 | Human              | 2015        | Brazil              | 3x C6/36, 1x Vero                                                   | KX520666                 |

<sup>a</sup>SM = suckling mouse;

<sup>b</sup>C6/36 = *Aedes albopictus* cells;

<sup>c</sup>Vero = African green monkey kidney cells.

**Table S3. Percent amino acid identity matrix of the ZIKV isolates used in this study.**

|                         | <b>Uganda/1947</b> | <b>Canada/2013</b> | <b>Puerto Rico/2015</b> | <b>Brazil/2015</b> |
|-------------------------|--------------------|--------------------|-------------------------|--------------------|
| <b>Uganda/1947</b>      | 100                | 97.01              | 96.90                   | 98.86              |
| <b>Canada/2013</b>      | 97.01              | 100                | 99.76                   | 99.62              |
| <b>Puerto Rico/2015</b> | 96.90              | 99.76              | 100                     | 99.71              |
| <b>Brazil/2015</b>      | 98.86              | 99.62              | 99.71                   | 100                |

Figure S1

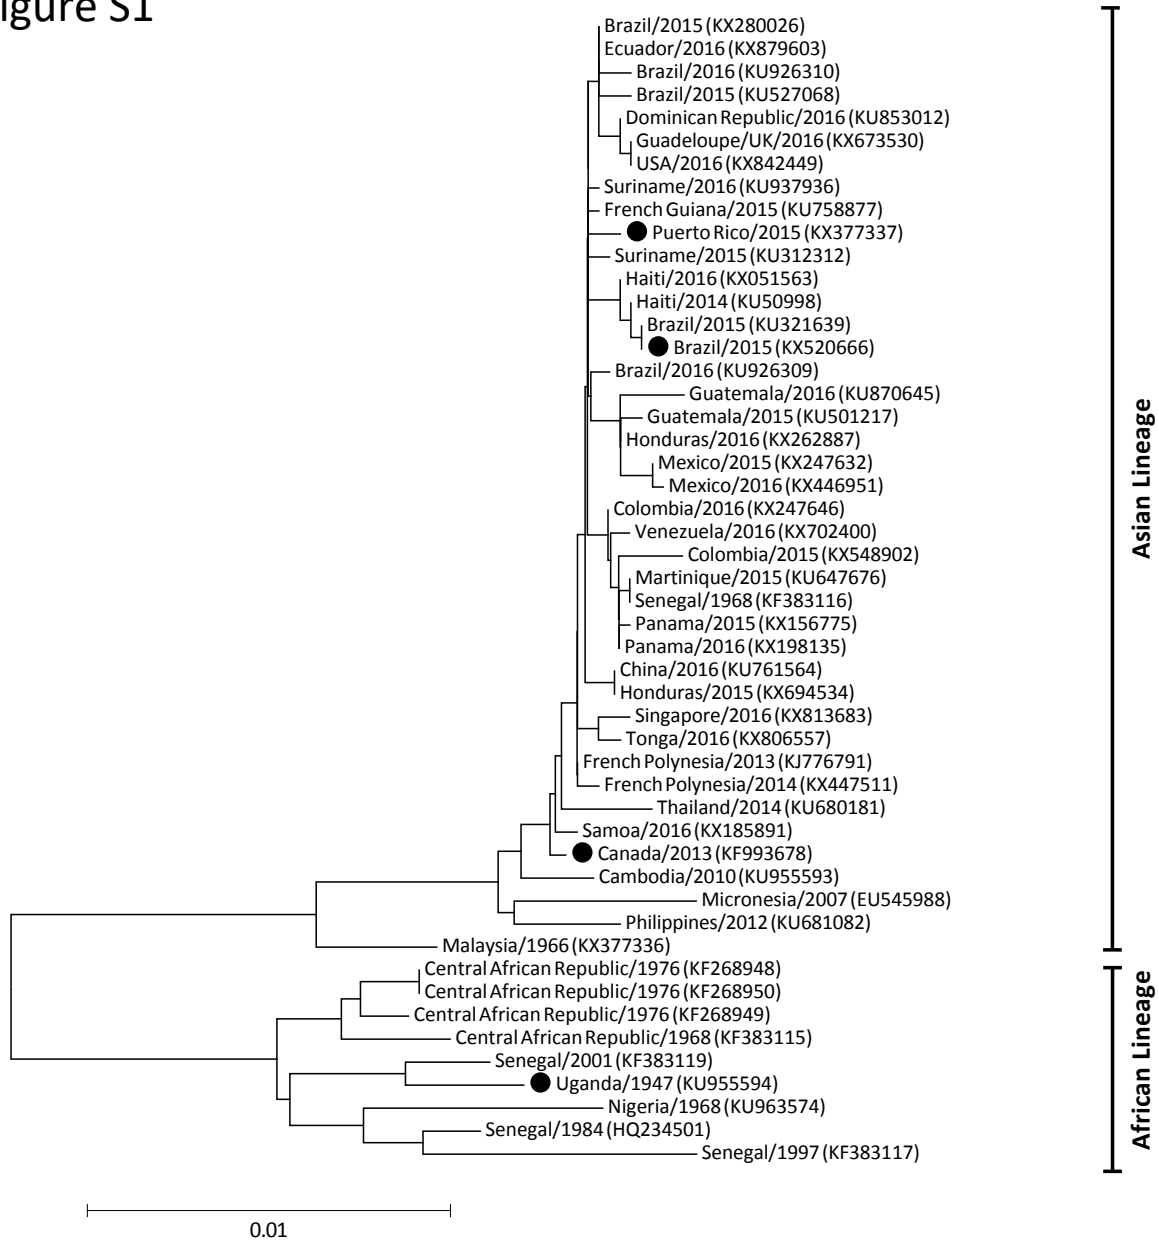

**Figure S1. Phylogenetic analysis of selected ZIKV strains.** Neighbor joining phylogenetic tree showing the position of the viral isolates used in this study (indicated by black circles) in the global ZIKV diversity. African and Asian lineages are indicated as well as country of origin, year of isolation, and GenBank accession number.

# Figure S2

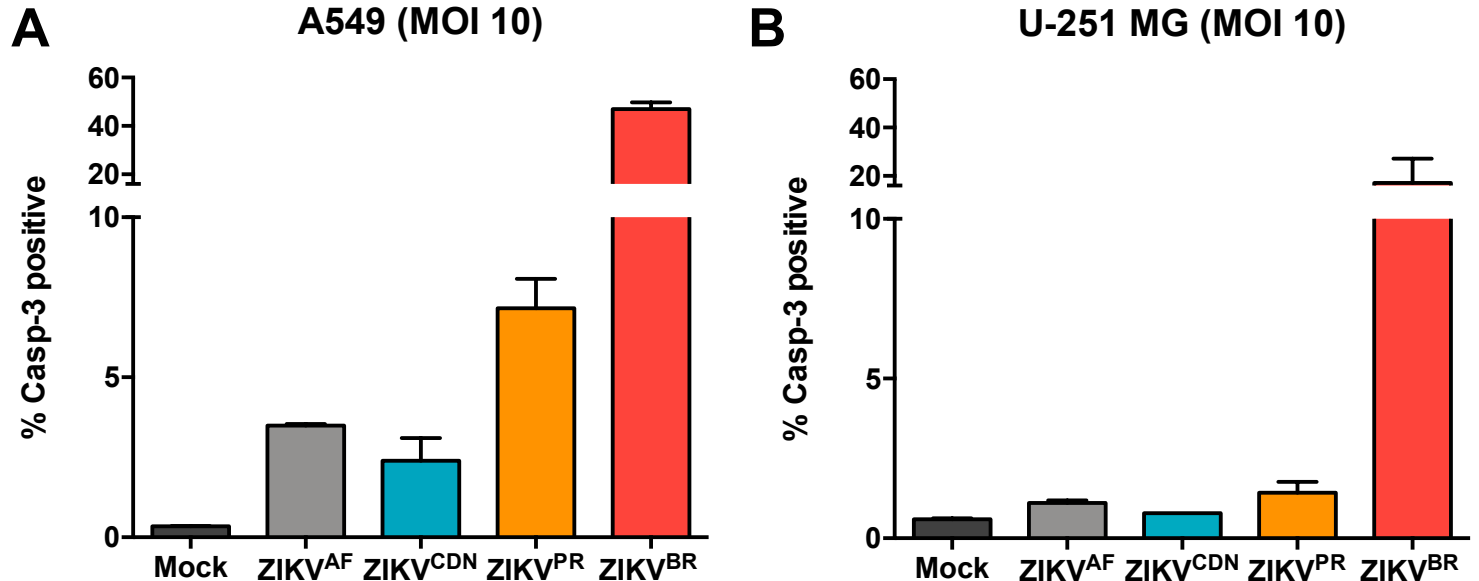

**Figure S2. ZIKV isolates differentially induce apoptosis.** (A) A549 cells and (B) U-251 MG cells were infected with ZIKV at MOI = 10 and 24 h post-infection the percentage of cells positive for cleaved caspase-3 was determined by flow cytometry. Values represent mean  $\pm$  SD of two independent experiments.

Figure S3

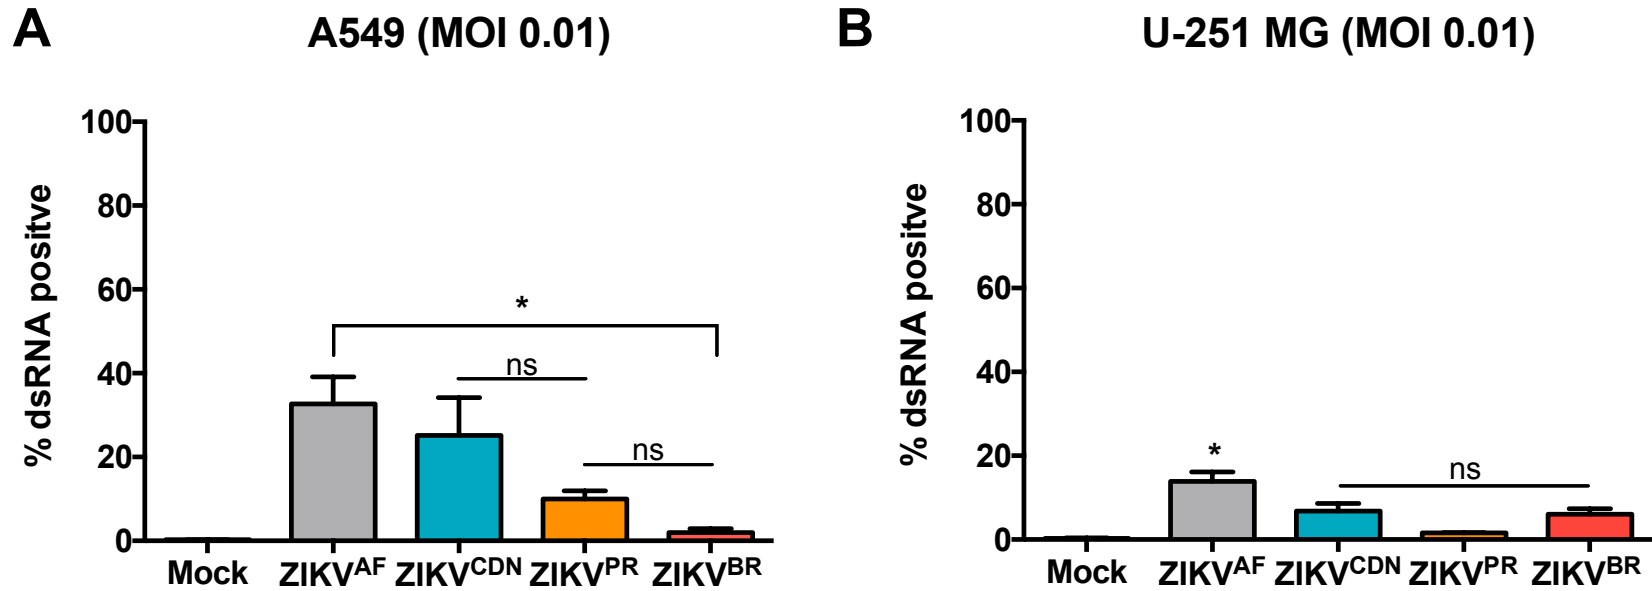

**Figure S3. ZIKV isolates differ in infectivity at low MOI.** (A) A549 cells and (B) U-251 MG cells were infected with ZIKV at MOI = 0.01 and 72 h post-infection the percentage of dsRNA-positive cells was determined by flow cytometry. Values represent mean  $\pm$  SEM of at least three independent experiments. Asterisks indicate significant differences in % infected cells: \*\*  $p < 0.01$ , \*\*\*  $p < 0.001$ .

**File S1: Amino acid sequence alignment of the ZIKV isolates used in this study.**

|                  | ↗ Capsid                                                     |     |
|------------------|--------------------------------------------------------------|-----|
| Uganda/1947      | MKNPKKKSGGFRIVNMLKRGVARVNPLGGLKRLPAGLLLGHPIRMVLAILAFLRFTA    | 60  |
| Canada/2013      | .....S·F.....                                                | 60  |
| Puerto Rico/2015 | .....S·F.....                                                | 60  |
| Brazil/2015      | .....S·F.....                                                | 60  |
| Uganda/1947      | PSLGLINRWGSVGGKEAMEI IKKFKKDLAAMLRIINARKERKRRGADTSIGIIGLLTTA | 120 |
| Canada/2013      | .....K·T·V·V.....                                            | 120 |
| Puerto Rico/2015 | .....T.....K·V·V.....                                        | 120 |
| Brazil/2015      | .....K·V·V.....                                              | 120 |
|                  | ↗ pre M                                                      |     |
| Uganda/1947      | MAAEITRRGSAYMYLDRSDAGKAISFATTLGVNKCHVQIMDLGHMCDATMSYECPLDE   | 180 |
| Canada/2013      | .....V.....E·P·M·YI.....                                     | 180 |
| Puerto Rico/2015 | .....V.....N·E·P·M·YI.....                                   | 180 |
| Brazil/2015      | .....V.....N·E·P·M·YI.....                                   | 180 |
| Uganda/1947      | GVEPDDVDCWCNTTSTWVVYGTCHHHKGEARRSRRAVTLPSHSTRKLQTRSQTWLESREY | 240 |
| Canada/2013      | .....                                                        | 240 |
| Puerto Rico/2015 | .....                                                        | 240 |
| Brazil/2015      | .....                                                        | 240 |
|                  | ↗ E protein                                                  |     |
| Uganda/1947      | TKHLIKVENWIFRNPGFALVAVAIAWLLGSSTSQKVIYLVMIILLIAPAYSIRCI      | 300 |
| Canada/2013      | .....R·A·A.....                                              | 300 |
| Puerto Rico/2015 | .....R·A·A.....                                              | 300 |
| Brazil/2015      | .....R·A·A.....                                              | 300 |
| Uganda/1947      | FVEGMSGGTWVDVLEHGGCVTVMAQDKPTVDIELVTTTVSNMAEVRSYCYEASISDMAS  | 360 |
| Canada/2013      | .....                                                        | 360 |
| Puerto Rico/2015 | .....                                                        | 360 |
| Brazil/2015      | .....I.....                                                  | 360 |
| Uganda/1947      | DSRCPTQGEAYLDKQSDTYVCKRTLVDNRGNGCGLFGKGLVTCAKFTCSKMTGKSI     | 420 |
| Canada/2013      | .....A.....                                                  | 420 |
| Puerto Rico/2015 | .....A.....                                                  | 420 |
| Brazil/2015      | .....A.....                                                  | 420 |
| Uganda/1947      | QPENLEYRIMLSVHGSQHSGMI----GYETDENRAKVEVTPNSPRAEATLGGFGSLGLDC | 476 |
| Canada/2013      | .....VNDT·H·I.....                                           | 480 |
| Puerto Rico/2015 | .....VNDT·H·I.....                                           | 480 |
| Brazil/2015      | .....VNDT·H·I.....                                           | 480 |
| Uganda/1947      | EPRTGLDFSDLYLTMNNKHVLVHKEWFHDIPLPWHAGADTGTTPHWNKEALVEFKDAHA  | 536 |
| Canada/2013      | .....                                                        | 540 |
| Puerto Rico/2015 | .....                                                        | 540 |
| Brazil/2015      | .....                                                        | 540 |
| Uganda/1947      | KRQTVVVLGSQEGAVHTALAGALEAEMDGAKGLFSGHLKCRKMDKRLKGVSYSLCTA    | 596 |
| Canada/2013      | .....R·S.....                                                | 600 |
| Puerto Rico/2015 | .....R·S.....                                                | 600 |
| Brazil/2015      | .....R·S.....                                                | 600 |
| Uganda/1947      | AFTFTKVPAETLHGTVTVEVQYAGTDGPKIPVQMAVDMQTLTPVGRGLITANPVITESTE | 656 |
| Canada/2013      | .....I.....V·A.....                                          | 660 |
| Puerto Rico/2015 | .....I.....V·A.....                                          | 660 |
| Brazil/2015      | .....I.....V·A.....                                          | 660 |
| Uganda/1947      | NSKMMLELDPPFGDSYIVIGVGDKKITHHWHRSSTIGKAFEATVRGAKRMAVLGDTAWD  | 716 |
| Canada/2013      | .....E.....                                                  | 720 |
| Puerto Rico/2015 | .....E.....                                                  | 720 |
| Brazil/2015      | .....E.....                                                  | 720 |
| Uganda/1947      | FGSVGGVFNSLGGKIHQIFGAAFKSLFSGMSWFSQILIGTLLVWLGLNKNKSISLTCLA  | 776 |
| Canada/2013      | .....AL.....M·M.....                                         | 780 |
| Puerto Rico/2015 | .....AL.....M·M.....                                         | 780 |
| Brazil/2015      | .....AL.....M·M.....                                         | 780 |
|                  | ↗ NS1                                                        |     |
| Uganda/1947      | LGGVMIFLSTAVSADVGCSDVFSKKEVTRCGTGVFIYNDVEAWRDRYKHPDPRRLAAAV  | 836 |
| Canada/2013      | .....L.....V.....                                            | 840 |
| Puerto Rico/2015 | .....L.....V.....                                            | 840 |
| Brazil/2015      | .....L.....V.....                                            | 840 |

|                  |                                                                                                                                                  |      |
|------------------|--------------------------------------------------------------------------------------------------------------------------------------------------|------|
| Uganda/1947      | KQAWEEGICGISSVSRMENIMWKSVEGELNAILEENGVQLTVVVGSVKNPMWRGPQRLPV                                                                                     | 896  |
| Canada/2013      | .....D.....R.....                                                                                                                                | 900  |
| Puerto Rico/2015 | .....D.....R.....G.....                                                                                                                          | 900  |
| Brazil/2015      | .....D.....R.....                                                                                                                                | 900  |
| Uganda/1947      | PVNELPHGWKAWGKSYFVRAAKTNNNSFVVDGDTLKECPLHRAWNSFLVEDHGFGVFHTS                                                                                     | 956  |
| Canada/2013      | .....K.....                                                                                                                                      | 960  |
| Puerto Rico/2015 | .....K.....                                                                                                                                      | 960  |
| Brazil/2015      | .....H.....K.....                                                                                                                                | 960  |
| Uganda/1947      | VWLKVEDYSLECDPAVIGTAVKGREAAHSDLGWIESEKNDTWRLKRAHLIEMKTCEWP                                                                                       | 1016 |
| Canada/2013      | .....K.....V.....                                                                                                                                | 1020 |
| Puerto Rico/2015 | .....K.....V.....                                                                                                                                | 1020 |
| Brazil/2015      | .....K.....V.....                                                                                                                                | 1020 |
| Uganda/1947      | KSHTLWTDGVEESDLIIPKSLAGPLSHHNTREGYRTQVKGPWHSEELEIRFEECPGTKVY                                                                                     | 1076 |
| Canada/2013      | .....I.....M.....H.....                                                                                                                          | 1080 |
| Puerto Rico/2015 | .....I.....M.....H.....                                                                                                                          | 1080 |
| Brazil/2015      | .....I.....M.....H.....                                                                                                                          | 1080 |
| Uganda/1947      | VEETCGTRGPSLRSTTASGRVIEEWCCRECTMPPLSFRAKDGCWYGMEIRPRKEPESNLV                                                                                     | 1136 |
| Canada/2013      | .....                                                                                                                                            | 1140 |
| Puerto Rico/2015 | .....                                                                                                                                            | 1140 |
| Brazil/2015      | .....                                                                                                                                            | 1140 |
|                  | <b>↳ NS2A</b>                                                                                                                                    |      |
| Uganda/1947      | RSMVTA <sup>↓</sup> GS <sup>↓</sup> TDHMDH <sup>↓</sup> FL <sup>↓</sup> SLGVLVILLMVQEG <sup>↓</sup> LKKRMTKIIMSTSMALV <sup>↓</sup> VVMILGGFSMSDL | 1196 |
| Canada/2013      | .....I.....A.....                                                                                                                                | 1200 |
| Puerto Rico/2015 | .....I.....A.....                                                                                                                                | 1200 |
| Brazil/2015      | .....I.....A.....                                                                                                                                | 1200 |
| Uganda/1947      | AKLVILMGATFAEMNTGGDVAHLALVA <sup>↓</sup> AFKVRPALLVSFIFRANWTPRESMLLALASCLL                                                                       | 1256 |
| Canada/2013      | .....A.....I.....                                                                                                                                | 1260 |
| Puerto Rico/2015 | .....A.....I.....                                                                                                                                | 1260 |
| Brazil/2015      | .....A.....I.....                                                                                                                                | 1260 |
| Uganda/1947      | QTAISALEGDLMLVINGFALAWLAIRAMAVPRTDNIALPILAALTPLARGTLLVAWRAGL                                                                                     | 1316 |
| Canada/2013      | .....V.....T.A.....                                                                                                                              | 1320 |
| Puerto Rico/2015 | .....V.....T.A.....                                                                                                                              | 1320 |
| Brazil/2015      | .....V.....T.A.....                                                                                                                              | 1320 |
|                  | <b>↳ NS2B</b>                                                                                                                                    |      |
| Uganda/1947      | ATCGGIMLLSLKKGKSVKKNLFFVMALGLTAVRVVDPINVVGLLLLTRSGKRS <sup>↓</sup> WPPSEVL                                                                       | 1376 |
| Canada/2013      | .....F.....L.....                                                                                                                                | 1380 |
| Puerto Rico/2015 | .....F.....L.....                                                                                                                                | 1380 |
| Brazil/2015      | .....F.....L.....                                                                                                                                | 1380 |
| Uganda/1947      | TAVGLICALAGGFAKADIEMAGPMAAVGLLIVSYVVS <sup>↓</sup> GKSVDMYIERAGDITWEKDAEVT                                                                       | 1436 |
| Canada/2013      | .....                                                                                                                                            | 1440 |
| Puerto Rico/2015 | .....                                                                                                                                            | 1440 |
| Brazil/2015      | .....                                                                                                                                            | 1440 |
| Uganda/1947      | GNSPRLDVALDESGDFSLVEEDGPPMREIILKVVLMAICGMNPIAIPFAAGAWYVYK <sup>↓</sup> TG                                                                        | 1496 |
| Canada/2013      | .....D.....T.....                                                                                                                                | 1500 |
| Puerto Rico/2015 | .....D.....T.....                                                                                                                                | 1500 |
| Brazil/2015      | .....D.....T.....                                                                                                                                | 1500 |
|                  | <b>↳ NS3</b>                                                                                                                                     |      |
| Uganda/1947      | KRS <sup>↓</sup> GALWDVPAPKEVKKGETTDGVYRVMTRRLLGSTQVGVGMQEGVFHTMWHVTKGAAL                                                                        | 1556 |
| Canada/2013      | .....S.....                                                                                                                                      | 1560 |
| Puerto Rico/2015 | .....S.....                                                                                                                                      | 1560 |
| Brazil/2015      | .....S.....                                                                                                                                      | 1560 |
| Uganda/1947      | RSGEGRLD <sup>↓</sup> DPYWDV <sup>↓</sup> KQDLVSYCGPWKLDAAWDGLSEVQLLAVPPGERARNIQTLP <sup>↓</sup> GIFKT                                           | 1616 |
| Canada/2013      | .....H.....                                                                                                                                      | 1620 |
| Puerto Rico/2015 | .....H.....                                                                                                                                      | 1620 |
| Brazil/2015      | .....H.....                                                                                                                                      | 1620 |
| Uganda/1947      | KDGDIGAVALDYPAGTSGSPILDKCGRVIGLYGNGVVIKNGSYVSAITQ <sup>↓</sup> GKREEETPVEC                                                                       | 1676 |
| Canada/2013      | .....R.....                                                                                                                                      | 1680 |
| Puerto Rico/2015 | .....R.....                                                                                                                                      | 1680 |
| Brazil/2015      | .....R.....                                                                                                                                      | 1680 |



|                  |                               |      |
|------------------|-------------------------------|------|
| Uganda/1947      | FEPSMLKKKQLTVLDDLHPGAGKTRRVLP | 1736 |
| Canada/2013      | .....T.....                   | 1740 |
| Puerto Rico/2015 | .....T.....                   | 1740 |
| Brazil/2015      | .....T.....                   | 1740 |
| Uganda/1947      | LPVRYMTTAVNVTHSGTEIVDLMCHATF  | 1796 |
| Canada/2013      | .....                         | 1800 |
| Puerto Rico/2015 | .....                         | 1800 |
| Brazil/2015      | .....                         | 1800 |
| Uganda/1947      | GYISTRVEMGEAAAIFMTATPPGTRDA   | 1856 |
| Canada/2013      | .....                         | 1860 |
| Puerto Rico/2015 | .....                         | 1860 |
| Brazil/2015      | .....Y.....                   | 1860 |
| Uganda/1947      | TVWVFPVSVRNGNEIAACLTKAGKRVI   | 1916 |
| Canada/2013      | .....H.....V.....             | 1920 |
| Puerto Rico/2015 | .....H.....V.....             | 1920 |
| Brazil/2015      | .....H.....V.....             | 1920 |
| Uganda/1947      | KADRVIDSRCLKPVILDGERVILAGPMP  | 1976 |
| Canada/2013      | .....L.....                   | 1980 |
| Puerto Rico/2015 | .....L.....                   | 1980 |
| Brazil/2015      | .....L.....                   | 1980 |
| Uganda/1947      | ETDEGHAHWLEARMLLDNIYLQDGLI    | 2036 |
| Canada/2013      | .....D.....                   | 2040 |
| Puerto Rico/2015 | .....D.....                   | 2040 |
| Brazil/2015      | .....D.....                   | 2040 |
| Uganda/1947      | GDLPVWLAYQVASAGITYTDRRWC      | 2096 |
| Canada/2013      | .....R.....                   | 2100 |
| Puerto Rico/2015 | .....RH.....                  | 2100 |
| Brazil/2015      | .....RH.....                  | 2100 |
| Uganda/1947      | VCS                           | 2156 |
| Canada/2013      | .....F.....                   | 2160 |
| Puerto Rico/2015 | .....F.....                   | 2160 |
| Brazil/2015      | .....F.....                   | 2160 |
| Uganda/1947      | KAAAAQLPETLETIMLLGLLGTVSLGI   | 2216 |
| Canada/2013      | .....                         | 2220 |
| Puerto Rico/2015 | .....                         | 2220 |
| Brazil/2015      | .....                         | 2220 |
| Uganda/1947      | PARIACVLIVVFLLLVLIPEPEKQRS    | 2276 |
| Canada/2013      | .....S.....                   | 2280 |
| Puerto Rico/2015 | .....S.....                   | 2280 |
| Brazil/2015      | .....S.....                   | 2280 |
| Uganda/1947      | DIAHLMGRREGATMGFSMDIDLRPAS    | 2336 |
| Canada/2013      | .....LS.....I.....F.....      | 2340 |
| Puerto Rico/2015 | .....LS.....I.....F.....      | 2340 |
| Brazil/2015      | .....LS.....I.....F.....      | 2340 |
| Uganda/1947      | TQAGVLFMGKMPFYAWDLGVPLLMGC    | 2396 |
| Canada/2013      | .....F.....I.....             | 2400 |
| Puerto Rico/2015 | .....F.....I.....             | 2400 |
| Brazil/2015      | .....F.....I.....             | 2400 |
| Uganda/1947      | ARAAQKRTAAGIMKNPVVDGIVVTD     | 2456 |
| Canada/2013      | .....V.....I.....S.....       | 2460 |
| Puerto Rico/2015 | .....V.....I.....S.....       | 2460 |
| Brazil/2015      | .....M.....V.....I.....S..... | 2460 |
| Uganda/1947      | WGEAGALITAAATSTLWEGSPNKYWN    | 2516 |
| Canada/2013      | .....                         | 2520 |
| Puerto Rico/2015 | .....                         | 2520 |
| Brazil/2015      | .....                         | 2520 |

→ NS4A

→ protein 2K

→ NS4B

→NS5

|                  |                                                                |      |
|------------------|----------------------------------------------------------------|------|
| Uganda/1947      | GGGTGETLGEKWKARLNQMSALEFYYSYKSGITEVCREEARRALKDGVATGGHAVSRGSA   | 2576 |
| Canada/2013      | .....                                                          | 2580 |
| Puerto_Rico/2015 | .....                                                          | 2580 |
| Brazil/2015      | .....                                                          | 2580 |
| Uganda/1947      | KLRWLVERGYLQPYGKVVDLGCGRGWSYYAATIRKVQEVRYTKGGPGHEEPMLVQSYG     | 2636 |
| Canada/2013      | .....I.....K.....                                              | 2640 |
| Puerto_Rico/2015 | .....I.....V.....K.....V.....                                  | 2640 |
| Brazil/2015      | .....I.....K.....V.....                                        | 2640 |
| Uganda/1947      | WNIVRLKSGVDVFMMAAEPDITLLCDIGESSSSPEVEETRILRVLSMVGDWLEKRPGAF    | 2696 |
| Canada/2013      | .....A.....                                                    | 2700 |
| Puerto_Rico/2015 | .....A.....                                                    | 2700 |
| Brazil/2015      | .....A.....                                                    | 2700 |
| Uganda/1947      | IKVLCPYTSTMMETMERLQRRHGGGLVVRPLSRNSTHEMYWVSGAKSNIKSVSTTSQLL    | 2756 |
| Canada/2013      | .....L.....Y.....T.....                                        | 2760 |
| Puerto_Rico/2015 | .....L.....Y.....T.....                                        | 2760 |
| Brazil/2015      | .....L.....Y.....T.....                                        | 2760 |
| Uganda/1947      | LGRMDGPRRPVKYEEVDNLGSGTRAVASCAEAPNMKIIIGRIERIRNEHAETWFLDENHP   | 2816 |
| Canada/2013      | .....V.....N.....S.....F.....                                  | 2820 |
| Puerto_Rico/2015 | .....V.....N.....S.....F.....                                  | 2820 |
| Brazil/2015      | .....V.....N.....S.....F.....                                  | 2820 |
| Uganda/1947      | YRTWAYHGSYEAPTQGSASSLVNGVRLLSKFPDVTGVTGIAMTDTPYQQRVFKEKV       | 2876 |
| Canada/2013      | .....I.....                                                    | 2880 |
| Puerto_Rico/2015 | .....I.....                                                    | 2880 |
| Brazil/2015      | .....I.....                                                    | 2880 |
| Uganda/1947      | DTRVPDPQEGTRQVMNIVSSWLKELGKRKRPRVCTKEEFINKVRSNAALGAI FEEEEKW   | 2936 |
| Canada/2013      | .....I·SM.....H.....                                           | 2940 |
| Puerto_Rico/2015 | .....SM.....H.....                                             | 2940 |
| Brazil/2015      | .....SM.....H.....                                             | 2940 |
| Uganda/1947      | KTAVEAVNDPRFWALVDREREHHLRGEGCHSCVYNNMGKREKKQGEFGKAKGSRAIYMWL   | 2996 |
| Canada/2013      | .....K.....Q.....                                              | 3000 |
| Puerto_Rico/2015 | .....K.....Q.....                                              | 3000 |
| Brazil/2015      | .....K.....Q.....                                              | 3000 |
| Uganda/1947      | GARFLEFEALGFLNEDHWMGRENSSGGVEGLGLQRLGYILEEMNRAPGGKMYADDTAGWD   | 3056 |
| Canada/2013      | .....V.....S·I·R.....                                          | 3060 |
| Puerto_Rico/2015 | .....V.....S·I·R.....                                          | 3060 |
| Brazil/2015      | .....V.....S·I·R.....                                          | 3060 |
| Uganda/1947      | TRISKFDLENEALITNQMEEGHRTLALAVIKYTYQNKVVKVLRPAEGGKTVMDDIISRDQ   | 3116 |
| Canada/2013      | ···R···K···A···I···K···                                        | 3120 |
| Puerto_Rico/2015 | ···R···K···A···I···K···                                        | 3120 |
| Brazil/2015      | ···R···K···A···I···K···                                        | 3120 |
| Uganda/1947      | RGSGQVVTYALNTFTNLVVQLIRNMEAEVLEMQLDWWLLRKEKVTWRWLQSNQWDRDKRM   | 3176 |
| Canada/2013      | .....RS···N.....                                               | 3180 |
| Puerto_Rico/2015 | .....RS···N.....                                               | 3180 |
| Brazil/2015      | .....RS···N.....                                               | 3180 |
| Uganda/1947      | AVSGDDCVVKPIDDRFAHALRFLNDMGKVRKDTQEWKPSGTGWSNWEEVPPFCSHHFNKLYL | 3236 |
| Canada/2013      | .....D.....H.....                                              | 3240 |
| Puerto_Rico/2015 | .....D.....H.....                                              | 3240 |
| Brazil/2015      | .....D.....H.....                                              | 3240 |
| Uganda/1947      | KDGRSIVVPCRHQDELIGRARVSPGAGWSIRETACLAKSYAQMWQLLYFHRRDLRLMANA   | 3296 |
| Canada/2013      | .....                                                          | 3300 |
| Puerto_Rico/2015 | .....                                                          | 3300 |
| Brazil/2015      | .....                                                          | 3300 |
| Uganda/1947      | ICSAVPVDWVPTGRTTWSIHGKGEWMTTEDMLMVVNRVWIEENDHMDKTPVTKWTDIPY    | 3356 |
| Canada/2013      | ···S···V···                                                    | 3360 |
| Puerto_Rico/2015 | ···S···V···                                                    | 3360 |
| Brazil/2015      | ···S···V···                                                    | 3360 |

|                  |                                                              |      |
|------------------|--------------------------------------------------------------|------|
| Uganda/1947      | LGKREDLWCGSLIGHRPRTTWAENIKDTVNMVRRRIIGDEEKYMDYLSAQVRYLGEEGSP | 3416 |
| Canada/2013      | .....N.....                                                  | 3420 |
| Puerto Rico/2015 | .....N.....                                                  | 3420 |
| Brazil/2015      | .....N.....                                                  | 3420 |
| Uganda/1947      | GVL                                                          | 3419 |
| Canada/2013      | ...                                                          | 3423 |
| Puerto Rico/2015 | ...                                                          | 3423 |
| Brazil/2015      | ...                                                          | 3423 |
